# Supplementary material for: Norms for the Dutch Version of the Young Schema Questionnaire – Adolescent in a Clinical Population
Source: Springer Nature journal article supplement (doi:10.1007/s10862-023-10065-5), 2023-07-10
Supplement: MOESM1 [file 25596838]

Table 1

*Norm table for Disconnection/Rejection among boys completing the questionnaire online* **___________________________________________________________________________________­­­­­­­­­­­­­­­­­­­­­­­­­­­­­­_________________________________**

Categorized *Z*-score and corresponding range of the raw domain scores for *Disconnection/Rejection*

| Age |  | *Z <* 0.0 |  |  | 0.0 to 0.5 |  |  | 0.5 to 1.0 |  |  | 1.0 to 1.5 |  |  | 1.5 to 2.0 |  |  | 2.0 to 2.5 |  |  | 2.5 to 3.0 |  |  | *Z* > 3.0 |
| --- | --- | --- | --- | --- | --- | --- | --- | --- | --- | --- | --- | --- | --- | --- | --- | --- | --- | --- | --- | --- | --- | --- | --- |
| 12 |  | <13.12 |  |  | 13.12–15.21 |  |  | 15.22–17.47 |  |  | 17.48–19.89 |  |  | 19.90–22.46 |  |  | 22.47–25.19 |  |  | 25.20–28.08 |  |  | >28.08 |
| 13 |  | <13.04 |  |  | 13.04–15.13 |  |  | 15.14–17.39 |  |  | 17.40–19.80 |  |  | 19.81–22.37 |  |  | 22.38–25.09 |  |  | 25.10–27.97 |  |  | >27.97 |
| 14 |  | <12.97 |  |  | 12.97–15.06 |  |  | 15.07–17.30 |  |  | 17.31–19.71 |  |  | 19.72–22.27 |  |  | 22.28–24.99 |  |  | 25.00–27.87 |  |  | >27.87 |
| 15 |  | <12.90 |  |  | 12.90–14.98 |  |  | 14.99–17.22 |  |  | 17.23–19.62 |  |  | 19.63–22.18 |  |  | 22.19–24.89 |  |  | 24.90–27.76 |  |  | >27.76 |
| 16 |  | <12.83 |  |  | 12.83–14.90 |  |  | 14.91–17.14 |  |  | 17.15–19.53 |  |  | 19.54–22.08 |  |  | 22.09–24.79 |  |  | 24.80–27.65 |  |  | >27.65 |
| 17 |  | <12.76 |  |  | 12.76–14.82 |  |  | 14.83–17.06 |  |  | 17.07–19.44 |  |  | 19.45–21.99 |  |  | 22.00–24.69 |  |  | 24.70–27.55 |  |  | >27.55 |
| 18 |  | <12.69 |  |  | 12.69–14.75 |  |  | 14.76–16.97 |  |  | 16.98–19.36 |  |  | 19.37–21.90 |  |  | 21.91–24.59 |  |  | 24.60–27.44 |  |  | >27.44 |
| 19 |  | <12.62 |  |  | 12.62–14.67 |  |  | 14.68–16.89 |  |  | 16.90–19.27 |  |  | 19.28–21.80 |  |  | 21.81–24.49 |  |  | 24.50–27.34 |  |  | >27.34 |
| 20 |  | <12.54 |  |  | 12.54–14.59 |  |  | 14.59–16.81 |  |  | 16.82–19.18 |  |  | 19.19–21.71 |  |  | 21.72–24.39 |  |  | 24.40–27.24 |  |  | >27.24 |
| 21 |  | <12.47 |  |  | 12.47–14.52 |  |  | 14.53–16.73 |  |  | 16.74–19.09 |  |  | 19.10–21.62 |  |  | 21.63–24.30 |  |  | 24.31–27.13 |  |  | >27.13 |
| 22 |  | <12.40 |  |  | 12.40–14.44 |  |  | 14.45–16.65 |  |  | 16.66–19.01 |  |  | 19.02–21.52 |  |  | 21.53–24.20 |  |  | 24.21–27.03 |  |  | >27.03 |
| 23 |  | <12.33 |  |  | 12.33–14.37 |  |  | 14.38–16.56 |  |  | 16.57–18.92 |  |  | 18.93–21.43 |  |  | 21.44–24.10 |  |  | 24.11–26.92 |  |  | >26.92 |
| 24 |  | <12.26 |  |  | 12.26–14.29 |  |  | 14.30–16.48 |  |  | 16.49–18.83 |  |  | 18.84–21.34 |  |  | 21.35–24.00 |  |  | 24.01–26.82 |  |  | >26.82 |
| 25 |  | <12.19 |  |  | 12.19–14.21 |  |  | 14.22–16.40 |  |  | 16.41–18.75 |  |  | 18.76–21.25 |  |  | 21.26–23.90 |  |  | 23.91–26.72 |  |  | >26.72 |

*Note.* Range of raw domain scores *Disconnection/Rejection* = 5 - 30. Age is presented in years. A raw score at the boundary between two categories implies a Z-score at the boundary as well, and vice versa.

Table 2

*Norm table for Disconnection/Rejection among boys completing the questionnaire on paper* **__________________________________________________________________________________­­­­­­­­­­­­­­­­__________________________________­­­­­­­­­­­­­­­­­­­­­­­­­­­­­­­­­­­­­­­­­­­­­­­­­­­­­­­­­­­­­­­**

Categorized *Z*-score and corresponding range of the raw domain scores for *Disconnection/Rejection*

| Age |  | *Z* < 0.0 |  |  | 0.0 to 0.5 |  |  | 0.5 to 1.0 |  |  | 1.0 to 1.5 |  |  | 1.5 to 2.0 |  |  | 2.0 to 2.5 |  |  | 2.5 to 3.0 |  |  | *Z* > 3.0 |
| --- | --- | --- | --- | --- | --- | --- | --- | --- | --- | --- | --- | --- | --- | --- | --- | --- | --- | --- | --- | --- | --- | --- | --- |
| 12 |  | <8.16 |  |  | 8.16–9.82 |  |  | 9.83–11.65 |  |  | 11.66–13.64 |  |  | 13.65–15.79 |  |  | 15.80–18.09 |  |  | 18.10–20.54 |  |  | >20.54 |
| 13 |  | <8.64 |  |  | 8.64–10.36 |  |  | 10.37–12.23 |  |  | 12.24–14.27 |  |  | 14.28–16.46 |  |  | 16.47–18.81 |  |  | 18.82–21.31 |  |  | >21.31 |
| 14 |  | <9.14 |  |  | 9.14–10.90 |  |  | 10.91–12.83 |  |  | 12.84–14.91 |  |  | 14.92–17.15 |  |  | 17.16–19.54 |  |  | 19.55–22.10 |  |  | >22.10 |
| 15 |  | <9.66 |  |  | 9.66–11.46 |  |  | 11.47–13.44 |  |  | 13.45–15.57 |  |  | 15.58–17.85 |  |  | 17.86–20.29 |  |  | 20.30–22.89 |  |  | >22.89 |
| 16 |  | <10.19 |  |  | 10.19–12.04 |  |  | 12.05–14.06 |  |  | 14.07–16.24 |  |  | 16.25–18.57 |  |  | 18.58–21.06 |  |  | 21.07–23.70 |  |  | >23.70 |
| 17 |  | <10.73 |  |  | 10.73–12.63 |  |  | 12.64–14.70 |  |  | 14.71–16.92 |  |  | 16.93–19.30 |  |  | 19.31–21.84 |  |  | 21.85–24.53 |  |  | >24.53 |
| 18 |  | <11.29 |  |  | 11.29–13.23 |  |  | 13.24–15.35 |  |  | 15.36–17.62 |  |  | 17.63–20.05 |  |  | 20.06–22.63 |  |  | 22.64–25.37 |  |  | >25.37 |
| 19 |  | <11.86 |  |  | 11.86–13.85 |  |  | 13.86–16.01 |  |  | 16.02–18.33 |  |  | 18.34–20.80 |  |  | 20.81–23.43 |  |  | 23.44–26.22 |  |  | >26.22 |
| 20 |  | <12.44 |  |  | 12.44–14.49 |  |  | 14.50–16.69 |  |  | 16.70–19.06 |  |  | 19.07–21.58 |  |  | 21.59–24.25 |  |  | 24.26–27.09 |  |  | >27.09 |
| 21 |  | <13.04 |  |  | 13.04–15.13 |  |  | 15.14–17.39 |  |  | 17.40–19.80 |  |  | 19.81–22.37 |  |  | 22.38–25.09 |  |  | 25.10–27.97 |  |  | >27.97 |
| 22 |  | <13.66 |  |  | 13.66–15.79 |  |  | 15.80–18.09 |  |  | 18.10–20.55 |  |  | 20.56–23.17 |  |  | 23.18–25.94 |  |  | 25.95–28.87 |  |  | >28.87 |
| 23 |  | <14.29 |  |  | 14.29–16.47 |  |  | 16.48–18.82 |  |  | 18.83–21.32 |  |  | 21.33–23.98 |  |  | 23.99–26.80 |  |  | 26.81–29.77 |  |  | >29.77 |
| 24 |  | <14.93 |  |  | 14.93–17.16 |  |  | 17.17–19.55 |  |  | 19.56–22.10 |  |  | 22.11–24.81 |  |  | 24.82–27.68 |  |  | 27.69–30.70 |  |  | >30.70 |
| 25 |  | <15.58 |  |  | 15.58–17.86 |  |  | 17.87–20.30 |  |  | 20.31–22.90 |  |  | 22.91–25.66 |  |  | 25.67–28.57 |  |  | 28.58–31.64 |  |  | >31.64 |

*Note.* Range of raw domain scores *Disconnection/Rejection* = 5 - 30. Age is presented in years. A raw score at the boundary between two categories implies a Z-score at the boundary as well, and vice versa.

Table 3

*Norm table for Disconnection/Rejection among girls completing the questionnaire online* **______________________________________________________________________________________________________________­­­­­­­­­­­­­­­­­­­­­­­­­­­­­­**

Categorized *Z*-score and corresponding range of the raw domain scores for *Disconnection/Rejection*

| Age |  | *Z* < 0.0 |  | 0.0 to 0.5 |  |  | 0.5 to 1.0 |  |  | 1.0 to 1.5 |  |  | 1.5 to 2.0 |  |  | 2.0 to 2.5 |  |  | 2.5 to 3.0 |  | *Z* > 3.0 |
| --- | --- | --- | --- | --- | --- | --- | --- | --- | --- | --- | --- | --- | --- | --- | --- | --- | --- | --- | --- | --- | --- |
| 12 |  | <15.60 |  | 15.60–17.88 |  |  | 17.89–20.32 |  |  | 20.33–22.93 |  |  | 22.94–25.68 |  |  | 25.69–28.60 |  |  | 28.61–31.67 |  | >31.67 |
| 13 |  | <15.16 |  | 15.16–17.41 |  |  | 17.42–19.82 |  |  | 19.83–22.39 |  |  | 22.40–25.12 |  |  | 25.13–28.00 |  |  | 28.01–31.04 |  | >31.04 |
| 14 |  | <14.73 |  | 14.73–16.95 |  |  | 16.96–19.33 |  |  | 19.34–21.87 |  |  | 21.88–24.56 |  |  | 24.57–27.41 |  |  | 27.42–30.42 |  | >30.42 |
| 15 |  | <14.30 |  | 14.30–16.49 |  |  | 16.50–18.84 |  |  | 18.85–21.34 |  |  | 21.35–24.01 |  |  | 24.02–26.83 |  |  | 26.84–29.80 |  | >29.80 |
| 16 |  | <13.88 |  | 13.88–16.04 |  |  | 16.05–18.36 |  |  | 18.37–20.83 |  |  | 20.84–23.46 |  |  | 23.47–26.25 |  |  | 26.26–29.19 |  | >29.19 |
| 17 |  | <13.47 |  | 13.47–15.59 |  |  | 15.60–17.88 |  |  | 17.89–20.32 |  |  | 20.33–22.92 |  |  | 22.93–25.68 |  |  | 25.69–28.59 |  | >28.59 |
| 18 |  | <13.06 |  | 13.06–15.15 |  |  | 15.16–17.41 |  |  | 17.42–19.82 |  |  | 19.83–22.39 |  |  | 22.40–25.12 |  |  | 25.13–28.00 |  | >28.00 |
| 19 |  | <12.66 |  | 12.66–14.72 |  |  | 14.73–16.94 |  |  | 16.95–19.33 |  |  | 19.34–21.86 |  |  | 21.87–24.56 |  |  | 24.57–27.41 |  | >27.41 |
| 20 |  | <12.27 |  | 12.27–14.29 |  |  | 14.30–16.49 |  |  | 16.50–18.84 |  |  | 18.85–21.34 |  |  | 21.35–24.01 |  |  | 24.02–26.82 |  | >26.82 |
| 21 |  | <11.88 |  | 11.88–13.87 |  |  | 13.88–16.03 |  |  | 16.04–18.35 |  |  | 18.36–20.83 |  |  | 20.84–23.46 |  |  | 23.47–26.25 |  | >26.25 |
| 22 |  | <11.49 |  | 11.49–13.46 |  |  | 13.47–15.59 |  |  | 15.60–17.88 |  |  | 17.89–20.32 |  |  | 20.33–22.92 |  |  | 22.93–25.68 |  | >25.68 |
| 23 |  | <11.12 |  | 11.12–13.05 |  |  | 13.06–15.15 |  |  | 15.16–17.41 |  |  | 17.42–19.82 |  |  | 19.83–22.39 |  |  | 22.40–25.11 |  | >25.11 |
| 24 |  | <10.75 |  | 10.75–12.65 |  |  | 12.66–14.72 |  |  | 14.73–16.94 |  |  | 16.95–19.32 |  |  | 19.33–21.86 |  |  | 21.87–24.55 |  | >24.55 |
| 25 |  | <10.38 |  | 10.38–12.25 |  |  | 12.26–14.29 |  |  | 14.30–16.48 |  |  | 16.49–18.83 |  |  | 18.84–21.34 |  |  | 21.35–24.00 |  | >24.00 |

*Note.* Range of raw domain scores *Disconnection/Rejection* = 5 - 30. Age is presented in years. A raw score at the boundary between two categories implies a Z-score at the boundary as well, and vice versa.

Table 4

*Norm table for Disconnection/Rejection among girls completing the questionnaire on paper* **_______________________________________________________________________________________________________________­­­­­­­­­­­­­­­­­­­­­­­­­­­­­­**

Categorized *Z*-score and corresponding range of the raw domain scores for *Disconnection/Rejection*

| Age |  | *Z* < 0.0 |  | 0.0 to 0.5 |  |  | 0.5 to 1.0 |  |  | 1.0 to 1.5 |  |  | 1.5 to 2.0 |  |  | 2.0 to 2.5 |  |  | 2.5 to 3.0 |  | *Z* > 3.0 |
| --- | --- | --- | --- | --- | --- | --- | --- | --- | --- | --- | --- | --- | --- | --- | --- | --- | --- | --- | --- | --- | --- |
| 12 |  | <12.57 |  | 12.57–14.63 |  |  | 14.64–16.84 |  |  | 16.85–19.22 |  |  | 19.23–21.75 |  |  | 21.76–24.44 |  |  | 24.45–27.28 |  | >27.28 |
| 13 |  | <12.85 |  | 12.85–14.92 |  |  | 14.93–17.16 |  |  | 17.17–19.55 |  |  | 19.55–22.11 |  |  | 22.12–24.81 |  |  | 24.82–27.68 |  | >27.68 |
| 14 |  | <13.12 |  | 13.12–15.21 |  |  | 15.22–17.47 |  |  | 17.48–19.89 |  |  | 19.90–22.46 |  |  | 22.47–25.19 |  |  | 25.20–28.08 |  | >28.08 |
| 15 |  | <13.40 |  | 13.40–15.51 |  |  | 15.52–17.79 |  |  | 17.80–20.23 |  |  | 20.24–22.83 |  |  | 22.84–25.58 |  |  | 25.59–28.48 |  | >28.48 |
| 16 |  | <13.68 |  | 13.68–15.81 |  |  | 15.82–18.11 |  |  | 18.12-20.57 |  |  | 20.58–23.19 |  |  | 23.20–25.96 |  |  | 25.97–28.89 |  | >28.89 |
| 17 |  | <13.96 |  | 13.96–16.12 |  |  | 16.13–18.44 |  |  | 18.45–20.92 |  |  | 20.93–23.56 |  |  | 23.57–26.35 |  |  | 26.36–29.30 |  | >29.30 |
| 18 |  | <14.24 |  | 14.24–16.42 |  |  | 16.43–18.77 |  |  | 18.78–21.27 |  |  | 21.28–23.93 |  |  | 23.94–26.74 |  |  | 26.75–29.71 |  | >29.71 |
| 19 |  | <14.53 |  | 14.53–16.73 |  |  | 16.74–19.10 |  |  | 19.11–21.62 |  |  | 21.63–24.30 |  |  | 24.31–27.14 |  |  | 27.15–30.13 |  | >30.13 |
| 20 |  | <14.82 |  | 14.82–17.04 |  |  | 17.05–19.43 |  |  | 19.44–21.98 |  |  | 21.99–24.68 |  |  | 24.69–27.53 |  |  | 27.54–30.55 |  | >30.55 |
| 21 |  | <15.12 |  | 15.12–17.36 |  |  | 17.37–19.77 |  |  | 19.78–22.33 |  |  | 22.34–25.06 |  |  | 25.07–27.93 |  |  | 27.94–30.97 |  | >30.97 |
| 22 |  | <15.41 |  | 15.41–17.68 |  |  | 17.69–20.11 |  |  | 20.12–22.69 |  |  | 22.70–25.44 |  |  | 25.45–28.34 |  |  | 28.35–31.39 |  | >31.39 |
| 23 |  | <15.71 |  | 15.71–18.00 |  |  | 18.01–20.45 |  |  | 20.46–23.06 |  |  | 23.07–25.82 |  |  | 25.83–28.74 |  |  | 28.75–31.82 |  | >31.82 |
| 24 |  | <16.02 |  | 16.02–18.32 |  |  | 18.33–20.79 |  |  | 20.80–23.42 |  |  | 23.43–26.21 |  |  | 26.22–29.15 |  |  | 29.16–32.25 |  | >32.25 |
| 25 |  | <16.32 |  | 16.32–18.65 |  |  | 18.66–21.14 |  |  | 21.15–23.79 |  |  | 23.80–26.60 |  |  | 26.61–29.56 |  |  | 29.57–32.68 |  | >32.68 |

*Note.* Range of raw domain scores *Disconnection/Rejection* = 5 - 30. Age is presented in years. A raw score at the boundary between two categories implies a Z-score at the boundary as well, and vice versa.

Table 5

*Norm table for Impaired Autonomy among boys, completing the questionnaire online* **___________________________________________________________________________________­­­­­­­­­­­­­­­­­­­­­­­­­­­­­­____________________________**

Categorized *Z*-score and corresponding range of the raw domain scores for *Impaired Autonomy*

| Age |  | *Z* < 0.0 |  | 0.0 to 0.5 |  |  | 0.5 to 1.0 |  |  | 1.0 to 1.5 |  |  | 1.5 to 2.0 |  |  | 2.0 to 2.5 |  |  | 2.5 to 3.0 |  | *Z* > 3.0 |
| --- | --- | --- | --- | --- | --- | --- | --- | --- | --- | --- | --- | --- | --- | --- | --- | --- | --- | --- | --- | --- | --- |
| 12 |  | <10.06 |  | 10.06–11.64 |  |  | 11.65–13.35 |  |  | 13.36–15.18 |  |  | 15.19–17.12 |  |  | 17.13–19.18 |  |  | 19.19–21.36 |  | >21.36 |
| 13 |  | <10.17 |  | 10.17–11.76 |  |  | 11.77–13.48 |  |  | 13.49–15.31 |  |  | 15.32–17.26 |  |  | 17.27–19.33 |  |  | 19.34–21.51 |  | >21.51 |
| 14 |  | <10.28 |  | 10.28–11.87 |  |  | 11.88–13.60 |  |  | 13.61–15.44 |  |  | 15.45–17.40 |  |  | 17.41–19.48 |  |  | 19.49–21.67 |  | >21.67 |
| 15 |  | <10.39 |  | 10.39–11.99 |  |  | 12.00–13.73 |  |  | 13.74–15.58 |  |  | 15.59–17.54 |  |  | 17.55–19.63 |  |  | 19.64–21.83 |  | >21.83 |
| 16 |  | <10.50 |  | 10.50–12.11 |  |  | 12.12–13.85 |  |  | 13.86–15.71 |  |  | 15.72–17.69 |  |  | 17.70–19.78 |  |  | 19.79–21.99 |  | >21.99 |
| 17 |  | <10.61 |  | 10.61–12.23 |  |  | 12.24–13.98 |  |  | 13.99–15.85 |  |  | 15.86–17.83 |  |  | 17.84–19.93 |  |  | 19.94–22.15 |  | >22.15 |
| 18 |  | <10.72 |  | 10.72–12.35 |  |  | 12.36–14.11 |  |  | 14.12–15.98 |  |  | 15.99–17.97 |  |  | 17.98–20.08 |  |  | 20.09–22.31 |  | >22.31 |
| 19 |  | <10.83 |  | 10.83–12.47 |  |  | 12.48–14.23 |  |  | 14.24–16.12 |  |  | 16.13–18.12 |  |  | 18.13–20.24 |  |  | 20.25–22.47 |  | >22.47 |
| 20 |  | <10.94 |  | 10.94–12.59 |  |  | 12.60–14.36 |  |  | 14.37–16.25 |  |  | 16.26–18.26 |  |  | 18.27–20.39 |  |  | 20.40–22.63 |  | >22.63 |
| 21 |  | <11.05 |  | 11.05–12.71 |  |  | 12.72–14.49 |  |  | 14.50–16.39 |  |  | 16.40–18.41 |  |  | 18.42–20.54 |  |  | 20.55–22.79 |  | >22.79 |
| 22 |  | <11.17 |  | 11.17–12.83 |  |  | 12.84–14.62 |  |  | 14.63–16.53 |  |  | 16.54–18.56 |  |  | 18.57–20.70 |  |  | 20.71–22.96 |  | >22.96 |
| 23 |  | <11.28 |  | 11.28–12.95 |  |  | 12.96–14.75 |  |  | 14.76–16.67 |  |  | 16.68–18.70 |  |  | 18.71–20.85 |  |  | 20.86–23.12 |  | >23.12 |
| 24 |  | <11.39 |  | 11.39–13.08 |  |  | 13.09–14.88 |  |  | 14.89–16.81 |  |  | 16.82–18.85 |  |  | 18.86–21.01 |  |  | 21.02–23.28 |  | >23.28 |
| 25 |  | <11.51 |  | 11.51–13.20 |  |  | 13.21–15.01 |  |  | 15.02–16.95 |  |  | 16.96–19.00 |  |  | 19.01–21.16 |  |  | 21.17–23.45 |  | >23.45 |

*Note.* Range of raw domain scores *Impaired Autonomy* = 4 - 24. Age is presented in years. A raw score at the boundary between two categories implies a Z-score at the boundary as well, and vice versa.

Table 6

*Norm table for Impaired Autonomy among boys, completing the questionnaire on paper* **______________________________________________________________________________________________________________­­­­­­­­­­­­­­­­­­­­­­­­­­­­­­**

Categorized *Z*-score and corresponding range of the raw domain scores for *Impaired Autonomy*

| Age |  | *Z* < 0.0 |  | 0.0 to 0.5 |  |  | 0.5 to 1.0 |  |  | 1.0 to 1.5 |  |  | 1.5 to 2.0 |  |  | 2.0 to 2.5 |  |  | 2.5 to 3.0 |  | *Z* > 3.0 |
| --- | --- | --- | --- | --- | --- | --- | --- | --- | --- | --- | --- | --- | --- | --- | --- | --- | --- | --- | --- | --- | --- |
| 12 |  | <7.84 |  | 7.84–9.24 |  |  | 9.25–10.77 |  |  | 10.78–12.42 |  |  | 12.43–14.18 |  |  | 14.19–16.06 |  |  | 16.07–18.06 |  | >18.06 |
| 13 |  | <7.93 |  | 7.93–9.35 |  |  | 9.36–10.88 |  |  | 10.89–12.54 |  |  | 12.55–14.31 |  |  | 14.32–16.20 |  |  | 16.21–18.20 |  | >18.20 |
| 14 |  | <8.03 |  | 8.03–9.45 |  |  | 9.46–10.99 |  |  | 11.00–12.66 |  |  | 12.67–14.44 |  |  | 14.45–16.33 |  |  | 16.34–18.35 |  | >18.35 |
| 15 |  | <8.13 |  | 8.13–9.55 |  |  | 9.56–11.11 |  |  | 11.12–12.78 |  |  | 12.79–14.57 |  |  | 14.58–16.47 |  |  | 16.48–18.49 |  | >18.49 |
| 16 |  | <8.22 |  | 8.22–9.66 |  |  | 9.67–11.22 |  |  | 11.23–12.90 |  |  | 12.91–14.70 |  |  | 14.71–16.61 |  |  | 16.62–18.64 |  | >18.64 |
| 17 |  | <8.32 |  | 8.32–9.77 |  |  | 9.78–11.34 |  |  | 11.35–13.02 |  |  | 13.03–14.83 |  |  | 14.84–16.75 |  |  | 16.76–18.79 |  | >18.79 |
| 18 |  | <8.42 |  | 8.42–9.87 |  |  | 9.88–11.45 |  |  | 11.46–13.15 |  |  | 13.16–14.96 |  |  | 14.97–16.89 |  |  | 16.90–18.93 |  | >18.93 |
| 19 |  | <8.52 |  | 8.52–9.98 |  |  | 9.99–11.57 |  |  | 11.58–13.27 |  |  | 13.28–15.09 |  |  | 15.10–17.03 |  |  | 17.04–19.08 |  | >19.08 |
| 20 |  | <8.62 |  | 8.62–10.09 |  |  | 10.10–11.68 |  |  | 11.69–13.39 |  |  | 13.40–15.22 |  |  | 15.23–17.17 |  |  | 17.18–19.23 |  | >19.23 |
| 21 |  | <8.72 |  | 8.72–10.20 |  |  | 10.21–11.80 |  |  | 11.81–13.52 |  |  | 13.53–15.36 |  |  | 15.37–17.31 |  |  | 17.32–19.38 |  | >19.38 |
| 22 |  | <8.82 |  | 8.82–10.30 |  |  | 10.31–11.92 |  |  | 11.93–13.64 |  |  | 13.65–15.49 |  |  | 15.50–17.45 |  |  | 17.46–19.53 |  | >19.53 |
| 23 |  | <8.92 |  | 8.92–10.41 |  |  | 10.42–12.03 |  |  | 12.04–13.77 |  |  | 13.78–15.62 |  |  | 15.63–17.59 |  |  | 17.60–19.68 |  | >19.68 |
| 24 |  | <9.02 |  | 9.02–10.52 |  |  | 10.53–12.15 |  |  | 12.16–13.90 |  |  | 13.91–15.76 |  |  | 15.77–17.74 |  |  | 17.75–19.83 |  | >19.83 |
| 25 |  | <9.13 |  | 9.13–10.63 |  |  | 10.64–12.27 |  |  | 12.28–14.02 |  |  | 14.03–15.89 |  |  | 15.90–17.88 |  |  | 17.89–19.98 |  | >19.98 |

*Note.* Range of raw domain scores *Impaired Autonomy* = 4 - 24. Age is presented in years. A raw score at the boundary between two categories implies a Z-score at the boundary as well, and vice versa.

Table 7

*Norm table for Impaired Autonomy among girls, completing the questionnaire online* **___________________________________________________________________________________­­­­­­­­­­­­­­­­­­­­­­­­­­­­­­___________________________**

Categorized *Z*-score and corresponding range of the raw domain scores for *Impaired Autonomy*

| Age |  | *Z* < 0.0 |  | 0.0 to 0.5 |  |  | 0.5 to 1.0 |  |  | 1.0 to 1.5 |  |  | 1.5 to 2.0 |  |  | 2.0 to 2.5 |  |  | 2.5 to 3.0 |  | *Z* > 3.0 |
| --- | --- | --- | --- | --- | --- | --- | --- | --- | --- | --- | --- | --- | --- | --- | --- | --- | --- | --- | --- | --- | --- |
| 12 |  | <13.34 |  | 13.34–15.16 |  |  | 15.17–17.10 |  |  | 17.11–19.16 |  |  | 19.17–21.33 |  |  | 21.34–23.63 |  |  | 23.64–26.04 |  | >26.04 |
| 13 |  | <13.01 |  | 13.01–14.80 |  |  | 14.81–16.72 |  |  | 16.73–18.76 |  |  | 18.77–20.91 |  |  | 20.92–23.18 |  |  | 23.19–25.57 |  | >25.57 |
| 14 |  | <12.68 |  | 12.68–14.45 |  |  | 14.46–16.35 |  |  | 16.36–18.36 |  |  | 18.37–20.49 |  |  | 20.50–22.74 |  |  | 22.75–25.11 |  | >25.11 |
| 15 |  | <12.35 |  | 12.35–14.10 |  |  | 14.11–15.98 |  |  | 15.99–17.97 |  |  | 17.98–20.08 |  |  | 20.09–22.30 |  |  | 22.31–24.65 |  | >24.65 |
| 16 |  | <12.03 |  | 12.03–13.76 |  |  | 13.77–15.61 |  |  | 15.62–17.58 |  |  | 17.59–19.67 |  |  | 19.68–21.87 |  |  | 21.88–24.19 |  | >24.19 |
| 17 |  | <11.72 |  | 11.72–13.42 |  |  | 13.43–15.25 |  |  | 15.26–17.20 |  |  | 17.21–19.26 |  |  | 19.27–21.44 |  |  | 21.45–23.74 |  | >23.74 |
| 18 |  | <11.40 |  | 11.40–13.08 |  |  | 13.09–14.89 |  |  | 14.90–16.82 |  |  | 16.83–18.86 |  |  | 18.87–21.02 |  |  | 21.03–23.30 |  | >23.30 |
| 19 |  | <11.10 |  | 11.10–12.75 |  |  | 12.76–14.54 |  |  | 14.55–16.44 |  |  | 16.45–18.46 |  |  | 18.47–20.60 |  |  | 20.61–22.85 |  | >22.85 |
| 20 |  | <10.79 |  | 10.79–12.43 |  |  | 12.44–14.19 |  |  | 14.20–16.07 |  |  | 16.08–18.07 |  |  | 18.08–20.19 |  |  | 20.20–22.42 |  | >22.42 |
| 21 |  | <10.49 |  | 10.49–12.11 |  |  | 12.12–13.85 |  |  | 13.86–15.71 |  |  | 15.72–17.68 |  |  | 17.69–19.77 |  |  | 19.78–21.98 |  | >21.98 |
| 22 |  | <10.20 |  | 10.20–11.79 |  |  | 11.80–13.51 |  |  | 13.52–15.34 |  |  | 15.35–17.30 |  |  | 17.31–19.37 |  |  | 19.38–21.55 |  | >21.55 |
| 23 |  | <9.90 |  | 9.90–11.47 |  |  | 11.48–13.17 |  |  | 13.18–14.98 |  |  | 14.99–16.92 |  |  | 16.93–18.96 |  |  | 18.97–21.13 |  | >21.13 |
| 24 |  | <9.62 |  | 9.62–11.16 |  |  | 11.17–12.84 |  |  | 12.85–14.63 |  |  | 14.64–16.54 |  |  | 16.55–18.57 |  |  | 18.58–20.71 |  | >20.71 |
| 25 |  | <9.33 |  | 9.33–10.86 |  |  | 10.87–12.51 |  |  | 12.52–14.28 |  |  | 14.29–16.17 |  |  | 16.18–18.17 |  |  | 18.18–20.29 |  | >20.29 |

*Note.* Range of raw domain scores *Impaired Autonomy* = 4 - 24. Age is presented in years. A raw score at the boundary between two categories implies a Z-score at the boundary as well, and vice versa.

Table 8

*Norm table for Impaired Autonomy among girls, completing the questionnaire on paper* **_______________________________________________________________________________________________________________­­­­­­­­­­­­­­­­­­­­­­­­­­­­­­**

Categorized *Z*-score and corresponding range of the raw domain scores for *Impaired Autonomy*

| Age |  | *Z* < 0.0 |  | 0.0 to 0.5 |  |  | 0.5 to 1.0 |  |  | 1.0 to 1.5 |  |  | 1.5 to 2.0 |  |  | 2.0 to 2.5 |  |  | 2.5 to 3.0 |  | *Z* > 3.0 |
| --- | --- | --- | --- | --- | --- | --- | --- | --- | --- | --- | --- | --- | --- | --- | --- | --- | --- | --- | --- | --- | --- |
| 12 |  | <10.76 |  | 10.76–12.40 |  |  | 12.41–14.16 |  |  | 14.17–16.04 |  |  | 16.05–18.04 |  |  | 18.05–20.15 |  |  | 20.16–22.38 |  | >22.38 |
| 13 |  | <10.47 |  | 10.47–12.08 |  |  | 12.09–13.82 |  |  | 13.83–15.67 |  |  | 15.68–17.65 |  |  | 17.66–19.74 |  |  | 19.75–21.95 |  | >21.95 |
| 14 |  | <10.17 |  | 10.17–11.76 |  |  | 11.77–13.48 |  |  | 13.49–15.31 |  |  | 15.32–17.26 |  |  | 17.27–19.33 |  |  | 19.34–21.52 |  | >21.52 |
| 15 |  | <9.88 |  | 9.88–11.45 |  |  | 11.46–13.14 |  |  | 13.15–14.95 |  |  | 14.96–16.88 |  |  | 16.89–18.93 |  |  | 18.94–21.09 |  | >21.09 |
| 16 |  | <9.59 |  | 9.59–11.14 |  |  | 11.15–12.81 |  |  | 12.82–14.60 |  |  | 14.61–16.51 |  |  | 16.52–18.53 |  |  | 18.54–20.67 |  | >20.67 |
| 17 |  | <9.31 |  | 9.31–10.83 |  |  | 10.84–12.48 |  |  | 12.49–14.25 |  |  | 14.26–16.14 |  |  | 16.15–18.14 |  |  | 18.15–20.26 |  | >20.26 |
| 18 |  | <9.03 |  | 9.03–10.53 |  |  | 10.54–12.16 |  |  | 12.17–13.91 |  |  | 13.92–15.77 |  |  | 15.78–17.75 |  |  | 17.76–19.84 |  | >19.84 |
| 19 |  | <8.76 |  | 8.76–10.24 |  |  | 10.25–11.84 |  |  | 11.85–13.56 |  |  | 13.57–15.40 |  |  | 15.41–17.36 |  |  | 17.37–19.44 |  | >19.44 |
| 20 |  | <8.49 |  | 8.49–9.94 |  |  | 9.95–11.53 |  |  | 11.54–13.23 |  |  | 13.24–15.05 |  |  | 15.06–16.98 |  |  | 16.99–19.03 |  | >19.03 |
| 21 |  | <8.22 |  | 8.22–9.66 |  |  | 9.67–11.22 |  |  | 11.23–12.90 |  |  | 12.91–14.69 |  |  | 14.70–16.60 |  |  | 16.61–18.63 |  | >18.63 |
| 22 |  | <7.96 |  | 7.96–9.37 |  |  | 9.38–10.91 |  |  | 10.92–12.57 |  |  | 12.58–14.34 |  |  | 14.35–16.23 |  |  | 16.24–18.24 |  | >18.24 |
| 23 |  | <7.70 |  | 7.70–9.09 |  |  | 9.10–10.61 |  |  | 10.62–12.24 |  |  | 12.25–13.99 |  |  | 14.00–15.86 |  |  | 15.87–17.85 |  | >17.85 |
| 24 |  | <7.45 |  | 7.45–8.82 |  |  | 8.83–10.31 |  |  | 10.32–11.92 |  |  | 11.93–13.65 |  |  | 13.66–15.50 |  |  | 15.51–17.46 |  | >17.46 |
| 25 |  | <7.20 |  | 7.20–8.55 |  |  | 8.56–10.02 |  |  | 10.03–11.61 |  |  | 11.62–13.31 |  |  | 13.32–15.14 |  |  | 15.15–17.08 |  | >17.08 |

*Note.* Range of raw domain scores *Impaired Autonomy* = 4 - 24. Age is presented in years. A raw score at the boundary between two categories implies a Z-score at the boundary as well, and vice versa.

Table 9

*Norm table for Impaired Limits among boys* **___________________________________________________________________________________­­­­­­­­­­­­­­­­­­­­­­­­­­­­­­______________________**

Categorized *Z*-score and corresponding range of the raw domain scores for *Impaired Limits*

| Age |  | *Z* < 0.0 |  | 0.0 to 0.5 |  |  | 0.5 to 1.0 |  |  | 1.0 to 1.5 |  |  | 1.5 to 2.0 |  |  | 2.0 to 2.5 |  |  | 2.5 to 3.0 |  | *Z* > 3.0 |
| --- | --- | --- | --- | --- | --- | --- | --- | --- | --- | --- | --- | --- | --- | --- | --- | --- | --- | --- | --- | --- | --- |
| 12 |  | <4.54 |  | 4.54–5.34 |  |  | 5.35–6.21 |  |  | 6.22–7.16 |  |  | 7.17–8.16 |  |  | 8.17–9.24 |  |  | 9.25–10.38 |  | >10.38 |
| 13 |  | <4.74 |  | 4.74–5.56 |  |  | 5.57–6.45 |  |  | 6.46–7.41 |  |  | 7.42–8.44 |  |  | 8.45–9.53 |  |  | 9.54–10.69 |  | >10.69 |
| 14 |  | <4.91 |  | 4.91–5.74 |  |  | 5.75–6.65 |  |  | 6.66–7.62 |  |  | 7.63–8.66 |  |  | 8.67–9.77 |  |  | 9.78–10.94 |  | >10.94 |
| 15 |  | <5.05 |  | 5.05–5.89 |  |  | 5.90–6.81 |  |  | 6.82–7.80 |  |  | 7.81–8.85 |  |  | 8.86–9.97 |  |  | 9.98–11.15 |  | >11.15 |
| 16 |  | <5.16 |  | 5.16–6.01 |  |  | 6.02–6.93 |  |  | 6.94–7.93 |  |  | 7.94–8.99 |  |  | 9.00–10.11 |  |  | 10.12–11.31 |  | >11.31 |
| 17 |  | <5.22 |  | 5.22–6.08 |  |  | 6.09–7.01 |  |  | 7.02–8.01 |  |  | 8.02–9.08 |  |  | 9.09–10.21 |  |  | 10.22–11.41 |  | >11.41 |
| 18 |  | <5.26 |  | 5.26–6.12 |  |  | 6.13–7.05 |  |  | 7.06–8.05 |  |  | 8.06–9.12 |  |  | 9.13–10.26 |  |  | 10.27–11.46 |  | >11.46 |
| 19 |  | <5.25 |  | 5.25–6.11 |  |  | 6.12–7.05 |  |  | 7.06–8.05 |  |  | 8.06–9.12 |  |  | 9.13–10.25 |  |  | 10.26–11.45 |  | >11.45 |
| 20 |  | <5.21 |  | 5.21–6.07 |  |  | 6.08–7.00 |  |  | 7.01–8.00 |  |  | 8.01–9.06 |  |  | 9.07–10.19 |  |  | 10.20–11.39 |  | >11.39 |
| 21 |  | <5.14 |  | 5.14–5.98 |  |  | 5.99–6.91 |  |  | 6.92–7.90 |  |  | 7.91–8.96 |  |  | 8.97–10.09 |  |  | 10.10–11.28 |  | >11.28 |
| 22 |  | <5.02 |  | 5.02–5.86 |  |  | 5.87–6.78 |  |  | 6.79–7.76 |  |  | 7.77–8.81 |  |  | 8.82–9.93 |  |  | 9.94–11.11 |  | >11.11 |
| 23 |  | <4.88 |  | 4.88–5.71 |  |  | 5.72–6.61 |  |  | 6.62–7.58 |  |  | 7.59–8.62 |  |  | 8.63–9.72 |  |  | 9.73–10.89 |  | >10.89 |
| 24 |  | <4.70 |  | 4.70–5.51 |  |  | 5.52–6.40 |  |  | 6.41–7.36 |  |  | 7.37–8.38 |  |  | 8.39–9.47 |  |  | 9.48–10.62 |  | >10.62 |
| 25 |  | <4.49 |  | 4.49–5.28 |  |  | 5.29–6.16 |  |  | 6.17–7.09 |  |  | 7.10–8.10 |  |  | 8.11–9.17 |  |  | 9.18–10.31 |  | >10.31 |

*Note.* Range of raw domain scores *Impaired Limits* = 2 - 12. Age is presented in years. A raw score at the boundary between two categories implies a Z-score at the boundary as well, and vice versa.

Table 10

*Norm table for Impaired Limits among girls* **___________________________________________________________________________________­­­­­­­­­­­­­­­­­­­­­­­­­­­­­­_____________________**

Categorized *Z*-score and corresponding range of the raw domain scores for *Impaired Limits*

| Age |  | *Z* <0.0 |  | 0.0 to 0.5 |  |  | 0.5 to 1.0 |  |  | 1.0 to 1.5 |  |  | 1.5 to 2.0 |  |  | 2.0 to 2.5 |  |  | 2.5 to 3.0 |  | *Z* > 3.0 |
| --- | --- | --- | --- | --- | --- | --- | --- | --- | --- | --- | --- | --- | --- | --- | --- | --- | --- | --- | --- | --- | --- |
| 12 |  | <5.28 |  | 5.28–6.14 |  |  | 6.15–7.08 |  |  | 7.09–8.09 |  |  | 8.10–9.16 |  |  | 9.17–10.29 |  |  | 10.30–11.50 |  | >11.50 |
| 13 |  | <5.37 |  | 5.37–6.23 |  |  | 6.24–7.18 |  |  | 7.19–8.19 |  |  | 8.20–9.27 |  |  | 9.28–10.41 |  |  | 10.42–11.62 |  | >11.62 |
| 14 |  | <5.41 |  | 5.41–6.29 |  |  | 6.30–7.23 |  |  | 7.24–8.25 |  |  | 8.26–9.33 |  |  | 9.34–10.47 |  |  | 10.48–11.69 |  | >11.69 |
| 15 |  | <5.42 |  | 5.42–6.30 |  |  | 6.31–7.24 |  |  | 7.25–8.26 |  |  | 8.27–9.34 |  |  | 9.35–10.49 |  |  | 10.50–11.70 |  | >11.70 |
| 16 |  | <5.40 |  | 5.40–6.27 |  |  | 6.28–7.21 |  |  | 7.22–8.23 |  |  | 8.24–9.30 |  |  | 9.31–10.45 |  |  | 10.46–11.66 |  | >11.66 |
| 17 |  | <5.33 |  | 5.33–6.20 |  |  | 6.21–7.14 |  |  | 7.15–8.15 |  |  | 8.16–9.22 |  |  | 9.23–10.36 |  |  | 10.37–11.57 |  | >11.57 |
| 18 |  | <5.23 |  | 5.23–6.09 |  |  | 6.10–7.02 |  |  | 7.03–8.02 |  |  | 8.03–9.09 |  |  | 9.10–10.22 |  |  | 10.23–11.42 |  | >11.42 |
| 19 |  | <5.10 |  | 5.10–5.94 |  |  | 5.95–6.86 |  |  | 6.87–7.85 |  |  | 7.86–8.91 |  |  | 8.92–10.03 |  |  | 10.04–11.22 |  | >11.22 |
| 20 |  | <4.93 |  | 4.93–5.76 |  |  | 5.77–6.67 |  |  | 6.68–7.64 |  |  | 7.65–8.68 |  |  | 8.69–9.79 |  |  | 9.80–10.97 |  | >10.97 |
| 21 |  | <4.73 |  | 4.73–5.54 |  |  | 5.55–6.43 |  |  | 6.44–7.39 |  |  | 7.40–8.42 |  |  | 8.43–9.51 |  |  | 9.52–10.66 |  | >10.66 |
| 22 |  | <4.49 |  | 4.49–5.29 |  |  | 5.30–6.16 |  |  | 6.17–7.10 |  |  | 7.11–8.11 |  |  | 8.12–9.18 |  |  | 9.19–10.32 |  | >10.32 |
| 23 |  | <4.24 |  | 4.24–5.01 |  |  | 5.02–5.86 |  |  | 5.87–6.77 |  |  | 6.78–7.76 |  |  | 7.77–8.81 |  |  | 8.82–9.92 |  | >9.92 |
| 24 |  | <3.95 |  | 3.95–4.70 |  |  | 4.71–5.53 |  |  | 5.54–6.42 |  |  | 6.43–7.37 |  |  | 7.38–8.40 |  |  | 8.41–9.49 |  | >9.49 |
| 25 |  | <3.65 |  | 3.65–4.37 |  |  | 4.38–5.17 |  |  | 5.18–6.03 |  |  | 6.04–6.96 |  |  | 6.97–7.95 |  |  | 7.96–9.01 |  | >9.01 |

*Note.* Range of raw domain scores *Impaired Limits* = 2 - 12. Age is presented in years. A raw score at the boundary between two categories implies a Z-score at the boundary as well, and vice versa.

Table 11

*Norm table for Other-directedness among boys, completing the questionnaire online* **_________________________________________________________________________________________________________­­­­­­­­­­­­­­­­­­­­­­­­­­­­­­**

Categorized *Z*-score and corresponding range of the raw domain scores for *Other-directedness*

| Age |  | *Z* < 0.0 |  | 0.0 to 0.5 |  |  | 0.5 to 1.0 |  |  | 1.0 to 1.5 |  |  | 1.5 to 2.0 |  |  | 2.0 to 2.5 |  |  | 2.5 to 3.0 |  | *Z* > 3.0 |
| --- | --- | --- | --- | --- | --- | --- | --- | --- | --- | --- | --- | --- | --- | --- | --- | --- | --- | --- | --- | --- | --- |
| 12 |  | <4.60 |  | 4.60–5.48 |  |  | 5.49–6.44 |  |  | 6.45–7.48 |  |  | 7.49–8.60 |  |  | 8.61–9.80 |  |  | 9.81–11.08 |  | >11.08 |
| 13 |  | <4.72 |  | 4.72–5.61 |  |  | 5.62–6.59 |  |  | 6.60–7.64 |  |  | 7.65–8.77 |  |  | 8.78–9.98 |  |  | 9.99–11.26 |  | >11.26 |
| 14 |  | <4.81 |  | 4.81–5.71 |  |  | 5.72–6.69 |  |  | 6.70–7.75 |  |  | 7.76–8.89 |  |  | 8.90–10.10 |  |  | 10.11–11.40 |  | >11.40 |
| 15 |  | <4.87 |  | 4.87–5.76 |  |  | 5.77–6.75 |  |  | 6.76–7.82 |  |  | 7.83–8.96 |  |  | 8.97–10.18 |  |  | 10.19–11.48 |  | >11.48 |
| 16 |  | <4.88 |  | 4.88–5.78 |  |  | 5.79–6.77 |  |  | 6.78–7.84 |  |  | 7.85–8.98 |  |  | 8.99–10.21 |  |  | 10.22–11.51 |  | >11.51 |
| 17 |  | <4.87 |  | 4.89–5.77 |  |  | 5.78–6.75 |  |  | 6.76–7.82 |  |  | 7.83–8.96 |  |  | 8.97–10.18 |  |  | 10.19–11.48 |  | >11.48 |
| 18 |  | <4.81 |  | 4.81–5.71 |  |  | 5.72–6.69 |  |  | 6.70–7.75 |  |  | 7.76–8.89 |  |  | 8.90–10.11 |  |  | 10.12–11.40 |  | >11.40 |
| 19 |  | <4.73 |  | 4.73–5.61 |  |  | 5.62–6.59 |  |  | 6.60–7.64 |  |  | 7.65–8.77 |  |  | 8.78–9.98 |  |  | 9.99–11.27 |  | >11.27 |
| 20 |  | <4.61 |  | 4.61–5.48 |  |  | 5.49–6.45 |  |  | 6.46–7.49 |  |  | 7.50–8.61 |  |  | 8.62–9.81 |  |  | 9.82–11.08 |  | >11.08 |
| 21 |  | <4.45 |  | 4.45–5.32 |  |  | 5.33–6.27 |  |  | 6.28–7.29 |  |  | 7.30–8.40 |  |  | 8.41–9.58 |  |  | 9.59–10.84 |  | >10.84 |
| 22 |  | <4.27 |  | 4.27–5.12 |  |  | 5.13–6.05 |  |  | 6.06–7.06 |  |  | 7.07–8.15 |  |  | 8.16–9.31 |  |  | 9.32–10.56 |  | >10.56 |
| 23 |  | <4.06 |  | 4.06–4.88 |  |  | 4.89–5.80 |  |  | 5.81–6.79 |  |  | 6.80–7.85 |  |  | 7.86–9.00 |  |  | 9.01–10.22 |  | >10.22 |
| 24 |  | <3.82 |  | 3.82–4.62 |  |  | 4.63–5.51 |  |  | 5.52–6.48 |  |  | 6.49–7.52 |  |  | 7.53–8.64 |  |  | 8.65–9.84 |  | >9.84 |
| 25 |  | <3.56 |  | 3.56–4.34 |  |  | 4.35–5.20 |  |  | 5.21–6.14 |  |  | 6.15–7.15 |  |  | 7.16–8.25 |  |  | 8.26–9.42 |  | >9.42 |

*Note.* Range of raw domain scores *Other-directedness* = 2 - 12. Age is presented in years. A raw score at the boundary between two categories implies a Z-score at the boundary as well, and vice versa.

Table 12

*Norm table for Other-directedness among boys, completing the questionnaire on paper* **___________________________________________________________________________________________________________­­­­­­­­­­­­­­­­­­­­­­­­­­­­­­**

Categorized *Z*-score and corresponding range of the raw domain scores for *Other-directedness*

| Age |  | *Z* < 0.0 |  | 0.0 to 0.5 |  |  | 0.5 to 1.0 |  |  | 1.0 to 1.5 |  |  | 1.5 to 2.0 |  |  | 2.0 to 2.5 |  |  | 2.5 to 3.0 |  | *Z* > 3.0 |
| --- | --- | --- | --- | --- | --- | --- | --- | --- | --- | --- | --- | --- | --- | --- | --- | --- | --- | --- | --- | --- | --- |
| 12 |  | <4.21 |  | 4.21–5.05 |  |  | 5.06–5.97 |  |  | 5.98–6.98 |  |  | 6.99–8.06 |  |  | 8.07–9.22 |  |  | 9.23–10.46 |  | >10.46 |
| 13 |  | <4.57 |  | 4.57–5.45 |  |  | 5.46–6.41 |  |  | 6.42–7.45 |  |  | 7.46–8.56 |  |  | 8.57–9.76 |  |  | 9.77–11.03 |  | >11.03 |
| 14 |  | <4.92 |  | 4.92–5.82 |  |  | 5.83–6.81 |  |  | 6.82–7.88 |  |  | 7.89–9.03 |  |  | 9.04–10.26 |  |  | 10.27–11.56 |  | >11.56 |
| 15 |  | <5.24 |  | 5.24–6.17 |  |  | 6.18–7.19 |  |  | 7.20–8.29 |  |  | 8.30–9.47 |  |  | 9.48–10.72 |  |  | 10.73–12.05 |  | >12.05 |
| 16 |  | <5.53 |  | 5.53–6.49 |  |  | 6.50–7.53 |  |  | 7.54–8.66 |  |  | 8.67–9.86 |  |  | 9.87–11.14 |  |  | 11.15–12.49 |  | >12.49 |
| 17 |  | <5.79 |  | 5.79–6.77 |  |  | 6.78–7.84 |  |  | 7.85–8.98 |  |  | 8.99–10.21 |  |  | 10.22–11.51 |  |  | 11.52–12.89 |  | >12.89 |
| 18 |  | <6.02 |  | 6.02–7.02 |  |  | 7.03–8.11 |  |  | 8.12–9.27 |  |  | 9.28–10.51 |  |  | 10.52–11.83 |  |  | 11.84–13.23 |  | >13.23 |
| 19 |  | <6.22 |  | 6.22–7.23 |  |  | 7.24–8.33 |  |  | 8.34–9.51 |  |  | 9.52–10.77 |  |  | 10.78–12.10 |  |  | 12.11–13.51 |  | >13.51 |
| 20 |  | <6.37 |  | 6.37–7.40 |  |  | 7.41–8.51 |  |  | 8.52–9.70 |  |  | 9.71–10.97 |  |  | 10.98–12.32 |  |  | 12.33–13.74 |  | >13.74 |
| 21 |  | <6.49 |  | 6.49–7.52 |  |  | 7.53–8.65 |  |  | 8.66–9.85 |  |  | 9.86–11.12 |  |  | 11.13–12.48 |  |  | 12.49–13.92 |  | >13.92 |
| 22 |  | <6.57 |  | 6.57–7.61 |  |  | 7.62–8.73 |  |  | 8.74–9.94 |  |  | 9.95–11.23 |  |  | 11.24–12.59 |  |  | 12.60–14.03 |  | >14.03 |
| 23 |  | <6.60 |  | 6.60–7.65 |  |  | 7.66–8.78 |  |  | 8.79–9.99 |  |  | 10.00–11.27 |  |  | 11.28–12.64 |  |  | 12.65–14.08 |  | >14.08 |
| 24 |  | <6.60 |  | 6.60–7.64 |  |  | 7.65–8.77 |  |  | 8.78–9.98 |  |  | 10.00–11.27 |  |  | 11.28–12.63 |  |  | 12.64–14.08 |  | >14.08 |
| 25 |  | <6.55 |  | 6.55–7.59 |  |  | 7.60–8.72 |  |  | 8.73–9.92 |  |  | 9.93–11.21 |  |  | 11.22–12.57 |  |  | 12.58–14.01 |  | >14.01 |

*Note.* Range of raw domain scores *Other-directedness* = 2 - 12. Age is presented in years. A raw score at the boundary between two categories implies a Z-score at the boundary as well, and vice versa.

Table 13

*Norm table for Other-directedness among girls, completing the questionnaire online* **__________________________________________________________________________________________________________­­­­­­­­­­­­­­­­­­­­­­­­­­­­­­**

Categorized *Z*-score and corresponding range of the raw domain scores for *Other-directedness*

| Age |  | *Z* < 0.0 |  | 0.0 to 0.5 |  |  | 0.5 to 1.0 |  |  | 1.0 to 1.5 |  |  | 1.5 to 2.0 |  |  | 2.0 to 2.5 |  |  | 2.5 to 3.0 |  | *Z* > 3.0 |
| --- | --- | --- | --- | --- | --- | --- | --- | --- | --- | --- | --- | --- | --- | --- | --- | --- | --- | --- | --- | --- | --- |
| 12 |  | <5.91 |  | 5.91–6.90 |  |  | 6.91–7.97 |  |  | 7.98–9.13 |  |  | 9.14–10.36 |  |  | 10.37–11.67 |  |  | 11.68–13.06 |  | >13.06 |
| 13 |  | <5.90 |  | 5.90–6.88 |  |  | 6.89–7.96 |  |  | 7.97–9.11 |  |  | 9.12–10.34 |  |  | 10.35–11.65 |  |  | 11.66–13.04 |  | >13.04 |
| 14 |  | <5.84 |  | 5.84–6.83 |  |  | 6.84–7.90 |  |  | 7.91–9.05 |  |  | 9.06–10.27 |  |  | 10.28–11.58 |  |  | 11.59–12.96 |  | >12.96 |
| 15 |  | <5.75 |  | 5.75–6.73 |  |  | 6.74–7.79 |  |  | 7.80–8.93 |  |  | 8.94–10.15 |  |  | 10.16–11.45 |  |  | 11.46–12.82 |  | >12.82 |
| 16 |  | <5.62 |  | 5.62–6.59 |  |  | 6.60–7.64 |  |  | 7.65–8.77 |  |  | 8.78–9.98 |  |  | 9.99–11.27 |  |  | 11.28–12.63 |  | >12.63 |
| 17 |  | <5.46 |  | 5.46–6.41 |  |  | 6.42–7.45 |  |  | 7.46–8.57 |  |  | 8.58–9.76 |  |  | 9.77–11.04 |  |  | 11.05–12.39 |  | >12.39 |
| 18 |  | <5.26 |  | 5.26–6.20 |  |  | 6.21–7.22 |  |  | 7.23–8.32 |  |  | 8.33–9.50 |  |  | 9.51–10.75 |  |  | 10.76–12.09 |  | >12.09 |
| 19 |  | <5.03 |  | 5.03–5.95 |  |  | 5.96–6.95 |  |  | 6.96–8.03 |  |  | 8.04–9.19 |  |  | 9.20–10.42 |  |  | 10.43–11.74 |  | >11.74 |
| 20 |  | <4.77 |  | 4.77–5.66 |  |  | 5.67–6.64 |  |  | 6.65–7.70 |  |  | 7.71–8.83 |  |  | 8.84–10.04 |  |  | 10.05–11.34 |  | >11.34 |
| 21 |  | <4.48 |  | 4.48–5.35 |  |  | 5.36–6.30 |  |  | 6.31–7.33 |  |  | 7.34–8.44 |  |  | 8.45–9.63 |  |  | 9.64–10.89 |  | >10.89 |
| 22 |  | <4.17 |  | 4.17–5.01 |  |  | 5.02–5.93 |  |  | 5.94–6.93 |  |  | 6.94–8.01 |  |  | 8.02–9.17 |  |  | 9.18–10.40 |  | >10.40 |
| 23 |  | <3.84 |  | 3.84–4.64 |  |  | 4.65–5.53 |  |  | 5.54–6.50 |  |  | 6.51–7.55 |  |  | 7.56–8.67 |  |  | 8.68–9.87 |  | >9.87 |
| 24 |  | <3.49 |  | 3.49–4.26 |  |  | 4.27–5.11 |  |  | 5.12–6.05 |  |  | 6.06–7.06 |  |  | 7.07–8.14 |  |  | 8.15–9.31 |  | >9.31 |
| 25 |  | <3.13 |  | 3.13–3.86 |  |  | 3.87–4.68 |  |  | 4.69–5.57 |  |  | 5.58–6.54 |  |  | 6.55–7.59 |  |  | 7.60–8.72 |  | >8.72 |

*Note.* Range of raw domain scores *Other-directedness* = 2 - 12. Age is presented in years. A raw score at the boundary between two categories implies a Z-score at the boundary as well, and vice versa.

Table 14

*Norm table for Other-directedness among girls, completing the questionnaire on paper* **___________________________________________________________________________________­­­­­­­­­­­­­­­­­­­­­­­­­­­­­­_________________________**

Categorized *Z*-score and corresponding range of the raw domain scores for *Other-directedness*

| Age |  | *Z* < 0.0 |  | 0.0 to 0.5 |  |  | 0.5 to 1.0 |  |  | 1.0 to 1.5 |  |  | 1.5 to 2.0 |  |  | 2.0 to 2.5 |  |  | 2.5 to 3.0 |  | *Z* > 3.0 |
| --- | --- | --- | --- | --- | --- | --- | --- | --- | --- | --- | --- | --- | --- | --- | --- | --- | --- | --- | --- | --- | --- |
| 12 |  | <5.46 |  | 5.46–6.41 |  |  | 6.42–7.45 |  |  | 7.46–8.57 |  |  | 8.58–9.77 |  |  | 9.78–11.04 |  |  | 11.05–12.39 |  | >12.39 |
| 13 |  | <5.73 |  | 5.73–6.70 |  |  | 6.71–7.76 |  |  | 7.77–8.90 |  |  | 8.91–10.12 |  |  | 10.13–11.42 |  |  | 11.43–12.79 |  | >12.79 |
| 14 |  | <5.96 |  | 5.96–6.95 |  |  | 6.96–8.03 |  |  | 8.04–9.19 |  |  | 9.20–10.43 |  |  | 10.44–11.74 |  |  | 11.75–13.14 |  | >13.14 |
| 15 |  | <6.16 |  | 6.16–7.17 |  |  | 7.18–8.26 |  |  | 8.27–9.44 |  |  | 9.45–10.69 |  |  | 10.70–12.02 |  |  | 12.03–13.43 |  | >13.43 |
| 16 |  | <6.32 |  | 6.32–7.34 |  |  | 7.35–8.45 |  |  | 8.46–9.64 |  |  | 9.65–10.90 |  |  | 10.91–12.24 |  |  | 12.25–13.66 |  | >13.66 |
| 17 |  | <6.44 |  | 6.44–7.47 |  |  | 7.48–8.59 |  |  | 8.60–9.79 |  |  | 9.80–11.06 |  |  | 11.07–12.41 |  |  | 12.42–13.84 |  | >13.84 |
| 18 |  | <6.52 |  | 6.52–7.56 |  |  | 7.57–8.68 |  |  | 8.69–9.89 |  |  | 9.90–11.17 |  |  | 11.18–12.53 |  |  | 12.54–13.96 |  | >13.96 |
| 19 |  | <6.56 |  | 6.56–7.60 |  |  | 7.61–8.73 |  |  | 8.74–9.94 |  |  | 9.95–11.22 |  |  | 11.23–12.58 |  |  | 12.59–14.02 |  | >14.02 |
| 20 |  | <6.56 |  | 6.56–7.60 |  |  | 7.61–8.73 |  |  | 8.74–9.94 |  |  | 9.95–11.22 |  |  | 11.23–12.59 |  |  | 12.60–14.03 |  | >14.03 |
| 21 |  | <6.52 |  | 6.52–7.56 |  |  | 7.57–8.69 |  |  | 8.70–9.89 |  |  | 9.90–11.17 |  |  | 11.18–12.53 |  |  | 12.54–13.97 |  | >13.97 |
| 22 |  | <6.44 |  | 6.44–7.47 |  |  | 7.48–8.59 |  |  | 8.60–9.79 |  |  | 9.80–11.06 |  |  | 11.07–12.42 |  |  | 12.43–13.85 |  | >13.85 |
| 23 |  | <6.32 |  | 6.32–7.34 |  |  | 7.35–8.45 |  |  | 8.46–9.64 |  |  | 9.65–10.91 |  |  | 10.92–12.25 |  |  | 12.26–13.67 |  | >13.67 |
| 24 |  | <6.16 |  | 6.16–7.17 |  |  | 7.18–8.27 |  |  | 8.28–9.44 |  |  | 9.45–10.70 |  |  | 10.71–12.03 |  |  | 12.04–13.44 |  | >13.44 |
| 25 |  | <5.97 |  | 5.97–6.96 |  |  | 6.97–8.04 |  |  | 8.05–9.20 |  |  | 9.21–10.44 |  |  | 10.45–11.75 |  |  | 11.76–13.15 |  | >13.15 |

*Note.* Range of raw domain scores *Other-directedness* = 2 - 12. Age is presented in years. A raw score at the boundary between two categories implies a Z-score at the boundary as well, and vice versa.

Table 15

*Norm table for Overvigilance/Inhibition among boys, completing the questionnaire online* **________________________________________________________________________________________________________­­­­­­­­­­­­­­­­­­­­­­­­­­­­­­**

Categorized *Z*-score and corresponding range of the raw domain scores for *Overvigilance/Inhibition*

| Age |  | *Z* < 0.0 |  | 0.0 to 0.5 |  |  | 0.5 to 1.0 |  |  | 1.0 to 1.5 |  |  | 1.5 to 2.0 |  |  | 2.0 to 2.5 |  |  | 2.5 to 3.0 |  | *Z* > 3.0 |
| --- | --- | --- | --- | --- | --- | --- | --- | --- | --- | --- | --- | --- | --- | --- | --- | --- | --- | --- | --- | --- | --- |
| 12 |  | <5.52 |  | 5.52–6.45 |  |  | 6.46–7.47 |  |  | 7.48–8.56 |  |  | 8.57–9.72 |  |  | 9.73–10.95 |  |  | 10.96–12.26 |  | >12.26 |
| 13 |  | <5.58 |  | 5.58–6.51 |  |  | 6.52–7.53 |  |  | 7.54–8.62 |  |  | 8.63–9.79 |  |  | 9.80–11.03 |  |  | 11.04–12.34 |  | >12.34 |
| 14 |  | <5.59 |  | 5.59–6.53 |  |  | 6.54–7.55 |  |  | 7.56–8.64 |  |  | 8.65–9.81 |  |  | 9.82–11.05 |  |  | 11.06–12.36 |  | >12.36 |
| 15 |  | <5.57 |  | 5.57–6.50 |  |  | 6.51–7.52 |  |  | 7.53–8.61 |  |  | 8.62–9.78 |  |  | 9.79–11.02 |  |  | 11.03–12.33 |  | >12.33 |
| 16 |  | <5.51 |  | 5.51–6.44 |  |  | 6.45–7.45 |  |  | 7.46–8.54 |  |  | 8.55–9.70 |  |  | 9.71–10.93 |  |  | 10.94–12.24 |  | >12.24 |
| 17 |  | <5.41 |  | 5.41–6.33 |  |  | 6.34–7.33 |  |  | 7.34–8.41 |  |  | 8.42–9.57 |  |  | 9.58–10.79 |  |  | 10.80–12.09 |  | >12.09 |
| 18 |  | <5.28 |  | 5.28–6.19 |  |  | 6.20–7.18 |  |  | 7.19–8.25 |  |  | 8.26–9.39 |  |  | 9.40–10.60 |  |  | 10.61–11.89 |  | >11.89 |
| 19 |  | <5.11 |  | 5.11–6.00 |  |  | 6.01–6.98 |  |  | 6.99–8.04 |  |  | 8.05–9.16 |  |  | 9.17–10.37 |  |  | 10.38–11.64 |  | >11.64 |
| 20 |  | <4.91 |  | 4.91–5.79 |  |  | 5.80–6.75 |  |  | 6.76–7.78 |  |  | 7.79–8.89 |  |  | 8.90–10.08 |  |  | 10.09–11.34 |  | >11.34 |
| 21 |  | <4.68 |  | 4.68–5.53 |  |  | 5.54–6.48 |  |  | 6.49–7.49 |  |  | 7.50–8.58 |  |  | 8.59–9.75 |  |  | 9.76–10.98 |  | >10.98 |
| 22 |  | <4.42 |  | 4.42–5.25 |  |  | 5.26–6.17 |  |  | 6.18–7.16 |  |  | 7.17–8.23 |  |  | 8.24–9.37 |  |  | 9.38–10.58 |  | >10.58 |
| 23 |  | <4.13 |  | 4.13–4.94 |  |  | 4.95–5.83 |  |  | 5.84–6.80 |  |  | 6.81–7.84 |  |  | 7.85–8.95 |  |  | 8.96–10.14 |  | >10.14 |
| 24 |  | <3.83 |  | 3.83–4.60 |  |  | 4.61–5.47 |  |  | 5.48–6.40 |  |  | 6.41–7.41 |  |  | 7.42–8.50 |  |  | 8.51–9.66 |  | >9.66 |
| 25 |  | <3.50 |  | 3.50–4.25 |  |  | 4.26–5.08 |  |  | 5.09–5.98 |  |  | 5.90–6.96 |  |  | 6.97–8.01 |  |  | 8.02–9.14 |  | >9.14 |

*Note.* Range of raw domain scores *Overvigilance/Inhibition* = 2 - 12. Age is presented in years. A raw score at the boundary between two categories implies a Z-score at the boundary as well, and vice versa.

Table 16

*Norm table for Overvigilance/Inhibition among boys, completing the questionnaire on paper* **__________________________________________________________________________________________________________­­­­­­­­­­­­­­­­­­­­­­­­­­­­­­**

Categorized *Z*-score and corresponding range of the raw domain scores for *Overvigilance/Inhibition*

| Age |  | *Z* < 0.0 |  | 0.0 to 0.5 |  |  | 0.5 to 1.0 |  |  | 1.0 to 1.5 |  |  | 1.5 to 2.0 |  |  | 2.0 to 2.5 |  |  | 2.5 to 3.0 |  | *Z* > 3.0 |
| --- | --- | --- | --- | --- | --- | --- | --- | --- | --- | --- | --- | --- | --- | --- | --- | --- | --- | --- | --- | --- | --- |
| 12 |  | <4.41 |  | 4.41–5.24 |  |  | 5.25–6.16 |  |  | 6.17–7.15 |  |  | 7.16–8.22 |  |  | 8.23–9.36 |  |  | 9.37–10.57 |  | >10.57 |
| 13 |  | <4.73 |  | 4.73–5.59 |  |  | 5.60–6.54 |  |  | 6.55–7.56 |  |  | 7.57–8.65 |  |  | 8.66–9.82 |  |  | 9.83–11.06 |  | >11.06 |
| 14 |  | <5.02 |  | 5.02–5.91 |  |  | 5.92–6.89 |  |  | 6.90–7.93 |  |  | 7.94–9.05 |  |  | 9.06–10.25 |  |  | 10.26–11.51 |  | >11.51 |
| 15 |  | <5.29 |  | 5.29–6.20 |  |  | 6.21–7.20 |  |  | 7.21–8.27 |  |  | 8.28–9.41 |  |  | 9.42–10.63 |  |  | 10.64–11.92 |  | >11.92 |
| 16 |  | <5.53 |  | 5.53–6.46 |  |  | 6.47–7.48 |  |  | 7.49–8.56 |  |  | 8.57–9.73 |  |  | 9.74–10.96 |  |  | 10.97–12.28 |  | >12.28 |
| 17 |  | <5.73 |  | 5.73–6.68 |  |  | 6.69–7.71 |  |  | 7.72–8.82 |  |  | 8.83–10.00 |  |  | 10.01–11.25 |  |  | 11.26–12.58 |  | >12.58 |
| 18 |  | <5.90 |  | 5.90–6.86 |  |  | 6.87–7.91 |  |  | 7.92–9.03 |  |  | 9.04–10.22 |  |  | 10.23–11.49 |  |  | 11.50–12.83 |  | >12.83 |
| 19 |  | <6.04 |  | 6.04–7.01 |  |  | 7.02–8.06 |  |  | 8.07–9.19 |  |  | 9.20–10.40 |  |  | 10.41–11.67 |  |  | 11.68–13.02 |  | >13.02 |
| 20 |  | <6.13 |  | 6.13–7.11 |  |  | 7.12–8.17 |  |  | 8.18–9.31 |  |  | 9.32–10.52 |  |  | 10.53–11.80 |  |  | 11.81–13.16 |  | >13.16 |
| 21 |  | <6.19 |  | 6.19–7.17 |  |  | 7.18–8.24 |  |  | 8.25–9.38 |  |  | 9.39–10.59 |  |  | 10.60–11.88 |  |  | 11.89–13.24 |  | >13.24 |
| 22 |  | <6.20 |  | 6.20–7.19 |  |  | 7.20–8.25 |  |  | 8.26–9.40 |  |  | 9.41–10.61 |  |  | 10.62–11.90 |  |  | 11.91–13.27 |  | >13.27 |
| 23 |  | <6.18 |  | 6.18–7.16 |  |  | 7.17–8.23 |  |  | 8.24–9.37 |  |  | 9.38–10.58 |  |  | 10.59–11.87 |  |  | 11.88–13.23 |  | >13.23 |
| 24 |  | <6.11 |  | 6.11–7.09 |  |  | 7.10–8.15 |  |  | 8.16–9.29 |  |  | 9.30–10.50 |  |  | 10.51–11.78 |  |  | 11.79–13.14 |  | >13.14 |
| 25 |  | <6.01 |  | 6.01–6.98 |  |  | 6.99–8.03 |  |  | 8.04–9.16 |  |  | 9.17–10.36 |  |  | 10.37–11.64 |  |  | 11.65–12.99 |  | >12.99 |

*Note.* Range of raw domain scores *Overvigilance/Inhibition* = 2 - 12. Age is presented in years. A raw score at the boundary between two categories implies a Z-score at the boundary as well, and vice versa.

Table 17

*Norm table for Overvigilance/Inhibition among girls, completing the questionnaire online* **__________________________________________________________________________________________________________­­­­­­­­­­­­­­­­­­­­­­­­­­­­­­**

Categorized *Z*-score and corresponding range of the raw domain scores for *Overvigilance/Inhibition*

| Age |  | *Z* < 0.0 |  | 0.0 to 0.5 |  |  | 0.5 to 1.0 |  |  | 1.0 to 1.5 |  |  | 1.5 to 2.0 |  |  | 2.0 to 2.5 |  |  | 2.5 to 3.0 |  | *Z* > 3.0 |
| --- | --- | --- | --- | --- | --- | --- | --- | --- | --- | --- | --- | --- | --- | --- | --- | --- | --- | --- | --- | --- | --- |
| 12 |  | <6.10 |  | 6.10–7.07 |  |  | 7.08–8.13 |  |  | 8.14–9.27 |  |  | 9.28–10.47 |  |  | 10.48–11.76 |  |  | 11.77–13.11 |  | >13.11 |
| 13 |  | <6.15 |  | 6.15–7.13 |  |  | 7.14–8.20 |  |  | 8.21–9.33 |  |  | 9.34–10.55 |  |  | 10.56–11.83 |  |  | 11.84–13.19 |  | >13.19 |
| 14 |  | <6.17 |  | 6.17–7.15 |  |  | 7.16–8.21 |  |  | 8.22–9.35 |  |  | 9.36–10.57 |  |  | 10.58–11.85 |  |  | 11.86–13.22 |  | >13.22 |
| 15 |  | <6.14 |  | 6.14–7.12 |  |  | 7.13–8.19 |  |  | 8.20–9.32 |  |  | 9.33–10.53 |  |  | 10.54–11.82 |  |  | 11.83–13.18 |  | >13.18 |
| 16 |  | <6.08 |  | 6.08–7.05 |  |  | 7.06–8.11 |  |  | 8.12–9.24 |  |  | 9.25–10.45 |  |  | 10.46–11.73 |  |  | 11.74–13.09 |  | >13.09 |
| 17 |  | <5.98 |  | 5.98–6.94 |  |  | 6.95–7.99 |  |  | 8.00–9.12 |  |  | 9.13–10.32 |  |  | 10.33–11.59 |  |  | 11.60–12.94 |  | >12.94 |
| 18 |  | <5.84 |  | 5.84–6.79 |  |  | 6.80–7.83 |  |  | 7.84–8.94 |  |  | 8.95–10.13 |  |  | 10.14–11.39 |  |  | 11.40–12.73 |  | >12.73 |
| 19 |  | <5.66 |  | 5.66–6.60 |  |  | 6.61–7.63 |  |  | 7.64–8.73 |  |  | 8.74–9.90 |  |  | 9.91–11.15 |  |  | 11.16–12.47 |  | >12.47 |
| 20 |  | <5.45 |  | 5.45–6.37 |  |  | 6.38–7.38 |  |  | 7.39–8.46 |  |  | 8.47–9.62 |  |  | 9.63–10.85 |  |  | 10.86–12.15 |  | >12.15 |
| 21 |  | <5.20 |  | 5.20–6.11 |  |  | 6.12–7.10 |  |  | 7.11–8.16 |  |  | 8.17–9.29 |  |  | 9.30–10.50 |  |  | 10.51–11.79 |  | >11.79 |
| 22 |  | <4.93 |  | 4.93–5.81 |  |  | 5.82–6.77 |  |  | 6.78–7.81 |  |  | 7.82–8.93 |  |  | 8.94–10.11 |  |  | 10.12–11.37 |  | >11.37 |
| 23 |  | <4.63 |  | 4.63–5.48 |  |  | 5.49–6.42 |  |  | 6.43–7.43 |  |  | 7.44–8.52 |  |  | 8.53–9.68 |  |  | 9.69–10.91 |  | >10.91 |
| 24 |  | <4.30 |  | 4.30–5.13 |  |  | 5.14–6.04 |  |  | 6.05–7.02 |  |  | 7.03–8.08 |  |  | 8.09–9.21 |  |  | 9.22–10.41 |  | >10.41 |
| 25 |  | <3.96 |  | 3.96–4.75 |  |  | 4.76–5.63 |  |  | 5.64–6.58 |  |  | 6.59–7.60 |  |  | 7.61–8.70 |  |  | 8.71–9.87 |  | >9.87 |

*Note.* Range of raw domain scores *Overvigilance/Inhibition* = 2 - 12. Age is presented in years. A raw score at the boundary between two categories implies a Z-score at the boundary as well, and vice versa.

Table 18

*Norm table for Overvigilance/Inhibition among girls, completing the questionnaire on paper* **____________________________________________________________________________________________________________­­­­­­­­­­­­­­­­­­­­­­­­­­­­­­**

Categorized *Z*-score and corresponding range of the raw domain scores for *Overvigilance/Inhibition*

| Age |  | *Z* < 0.0 |  | 0.0 to 0.5 |  |  | 0.5 to 1.0 |  |  | 1.0 to 1.5 |  |  | 1.5 to 2.0 |  |  | 2.0 to 2.5 |  |  | 2.5 to 3.0 |  | *Z* > 3.0 |
| --- | --- | --- | --- | --- | --- | --- | --- | --- | --- | --- | --- | --- | --- | --- | --- | --- | --- | --- | --- | --- | --- |
| 12 |  | <4.92 |  | 4.92–5.80 |  |  | 5.81–6.76 |  |  | 6.77–7.80 |  |  | 7.81–8.91 |  |  | 8.92–10.10 |  |  | 10.11–11.36 |  | >11.36 |
| 13 |  | <5.26 |  | 5.26–6.17 |  |  | 6.18–7.16 |  |  | 7.17–8.23 |  |  | 8.24–9.37 |  |  | 9.38–10.58 |  |  | 10.59–11.87 |  | >11.87 |
| 14 |  | <5.57 |  | 5.57–6.51 |  |  | 6.52–7.52 |  |  | 7.53–8.62 |  |  | 8.63–9.78 |  |  | 9.79–11.02 |  |  | 11.03–12.34 |  | >12.34 |
| 15 |  | <5.85 |  | 5.85–6.81 |  |  | 6.82–7.85 |  |  | 7.86–8.97 |  |  | 8.98–10.16 |  |  | 10.17–11.42 |  |  | 11.43–12.76 |  | >12.76 |
| 16 |  | <6.10 |  | 6.10–7.08 |  |  | 7.09–8.14 |  |  | 8.15–9.28 |  |  | 9.29–10.48 |  |  | 10.49–11.77 |  |  | 11.78–13.12 |  | >13.12 |
| 17 |  | <6.32 |  | 6.32–7.31 |  |  | 7.32–8.39 |  |  | 8.40–9.54 |  |  | 9.55–10.77 |  |  | 10.78–12.06 |  |  | 12.07–13.44 |  | >13.44 |
| 18 |  | <6.50 |  | 6.50–7.50 |  |  | 7.51–8.59 |  |  | 8.60–9.76 |  |  | 9.77–11.00 |  |  | 11.01–12.31 |  |  | 12.32–13.70 |  | >13.70 |
| 19 |  | <6.63 |  | 6.63–7.65 |  |  | 7.66–8.75 |  |  | 8.76–9.93 |  |  | 9.94–11.18 |  |  | 11.19–12.50 |  |  | 12.51–13.90 |  | >13.90 |
| 20 |  | <6.73 |  | 6.73–7.76 |  |  | 7.77–8.87 |  |  | 8.88–10.05 |  |  | 10.06–11.31 |  |  | 11.32–12.64 |  |  | 12.65–14.04 |  | >14.04 |
| 21 |  | <6.79 |  | 6.79–7.82 |  |  | 7.83–8.93 |  |  | 8.94–10.12 |  |  | 10.13–11.38 |  |  | 11.39–12.72 |  |  | 12.73–14.12 |  | >14.12 |
| 22 |  | <6.81 |  | 6.81–7.84 |  |  | 7.85–8.95 |  |  | 8.96–10.14 |  |  | 10.15–11.40 |  |  | 11.41–12.74 |  |  | 12.75–14.15 |  | >14.15 |
| 23 |  | <6.78 |  | 6.78–7.81 |  |  | 7.82–8.92 |  |  | 8.93–10.11 |  |  | 10.12–11.37 |  |  | 11.38–12.70 |  |  | 12.71–14.11 |  | >14.11 |
| 24 |  | <6.72 |  | 6.72–7.74 |  |  | 7.75–8.85 |  |  | 8.86–10.03 |  |  | 10.04–11.28 |  |  | 11.29–12.61 |  |  | 12.62–14.01 |  | >14.01 |
| 25 |  | <6.61 |  | 6.61–7.62 |  |  | 7.63–8.72 |  |  | 8.73–9.89 |  |  | 9.90–11.14 |  |  | 11.15–12.46 |  |  | 12.47–13.86 |  | >13.86 |

*Note.* Range of raw domain scores *Overvigilance/Inhibition* = 2 - 12. Age is presented in years. A raw score at the boundary between two categories implies a Z-score at the boundary as well, and vice versa.
